# Supplementary material for: Evaluating and Improving Neonatal Gentamicin Pharmacokinetic Models Using Aggregated Routine Clinical Care Data
Source: MDPI journal article supplement (doi:10.3390/pharmaceutics14102089), 2022-09-30
Supplement: s1 [file s1]

# Supplemental for: Evaluating and improving neonatal gentamicin pharmacokinetic models using aggregated routine clinical care data

Dominic M.H. Tong, Jasmine H. Hughes, and Ron J. Keizer

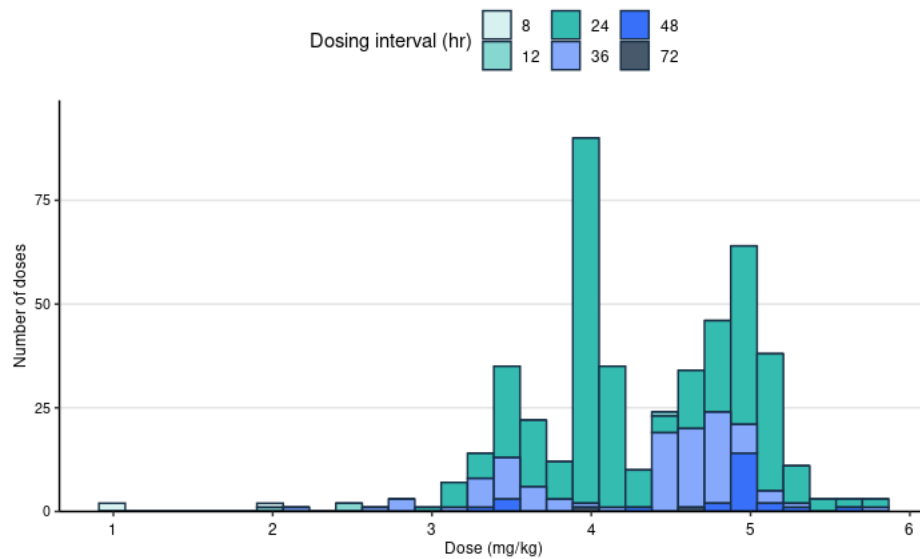

**Supplemental Figure S1:** Initial gentamicin dosing in mg/kg by estimated dosing interval, which is the actual dosing interval rounded to the nearest values shown.

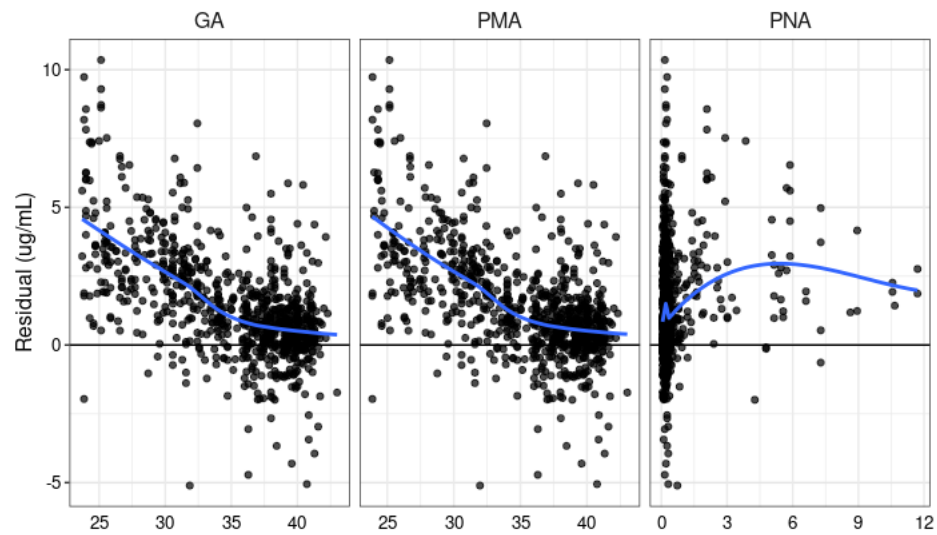

**Supplemental Figure S2:** Residual (predicted value minus observed value) by gestational age (GA; weeks), postmenstrual age (PMA, sum of gestational age and postnatal age; weeks), and postnatal age (PNA; weeks) using the De Cock model. Blue line represents the locally estimated scatterplot smoothing (LOESS) curve.

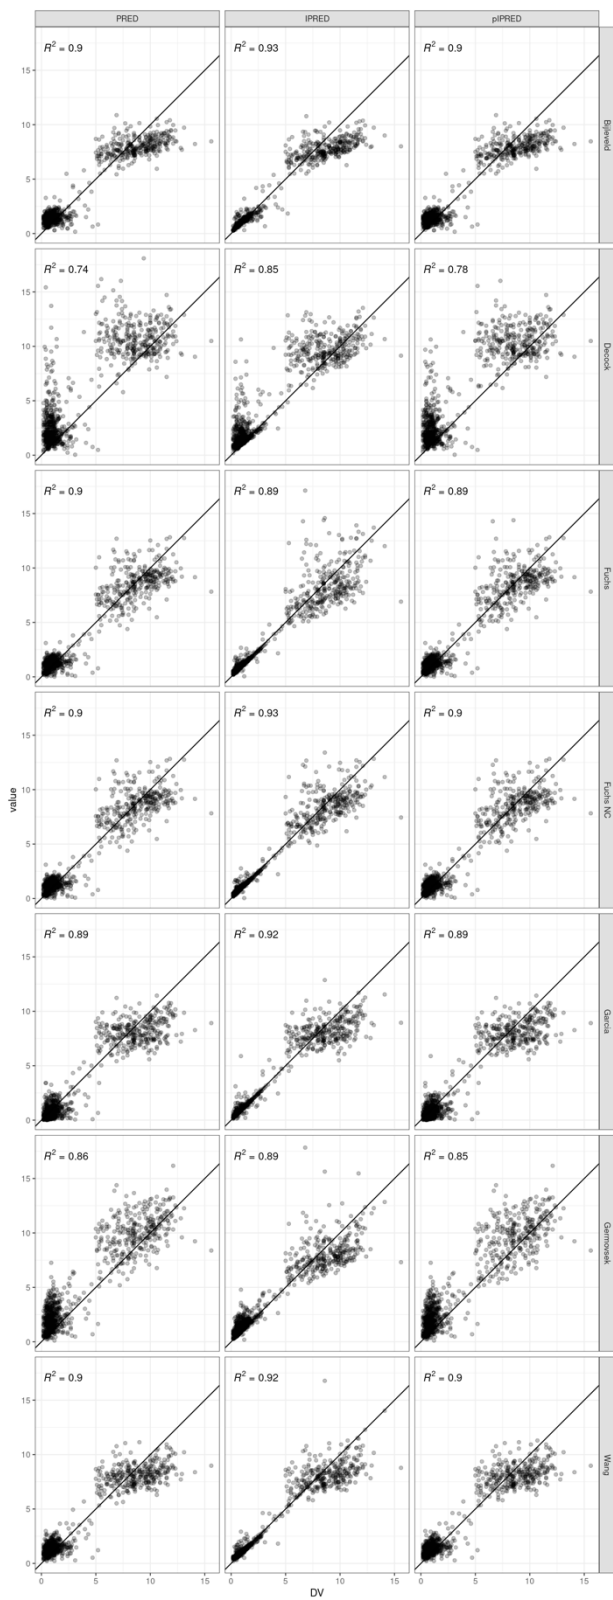

**Supplemental Figure S3.** Individual prediction (IPRED), population prediction (PRED), and iterative prediction (pIPRED) for published gentamicin population pharmacokinetic models on all available data.

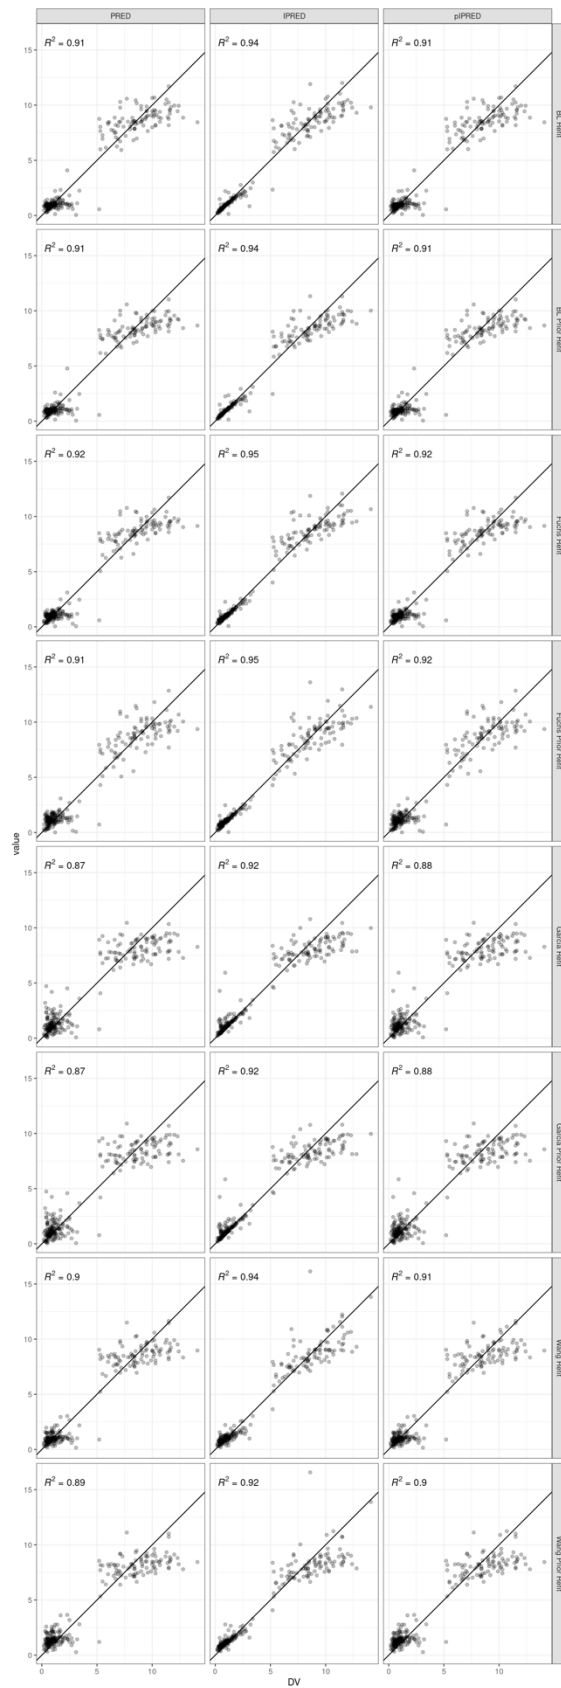

**Supplemental Figure S4.** Individual prediction (IPRED), population prediction (PRED), and iterative prediction (pIPRED) for continuous learning models on test data set.

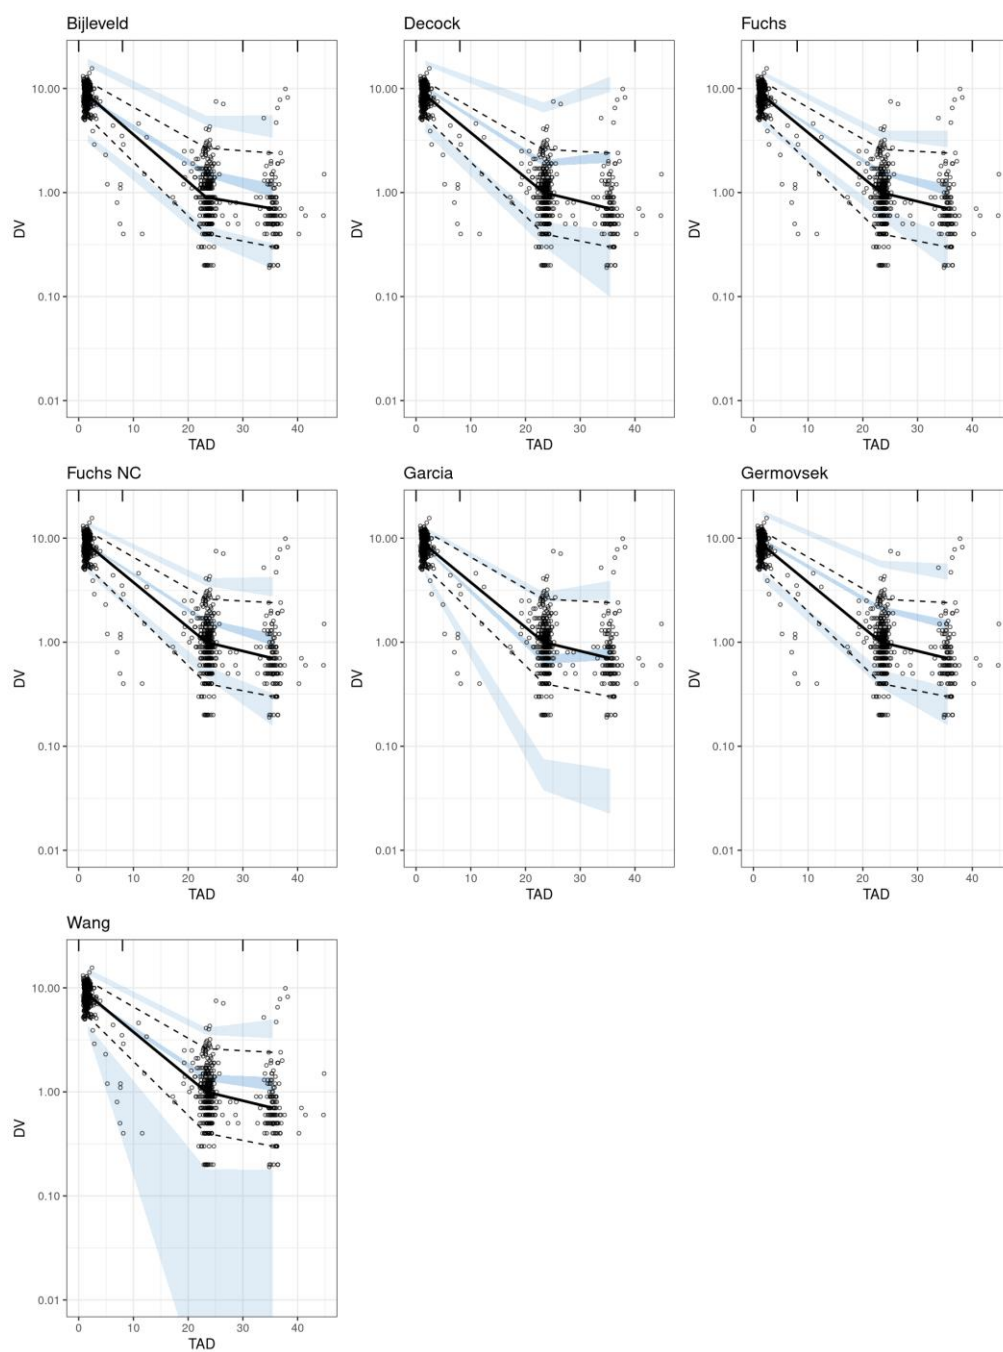

**Supplemental Figure S5.** Visual predictive checks (VPCs) of published models with observed gentamicin concentrations (circles) and population predictions (solid line) with corresponding 95% prediction interval (dotted lines). Semi-transparent blue fields represent model-based percentile confidence interval. BL: Bijleveld.

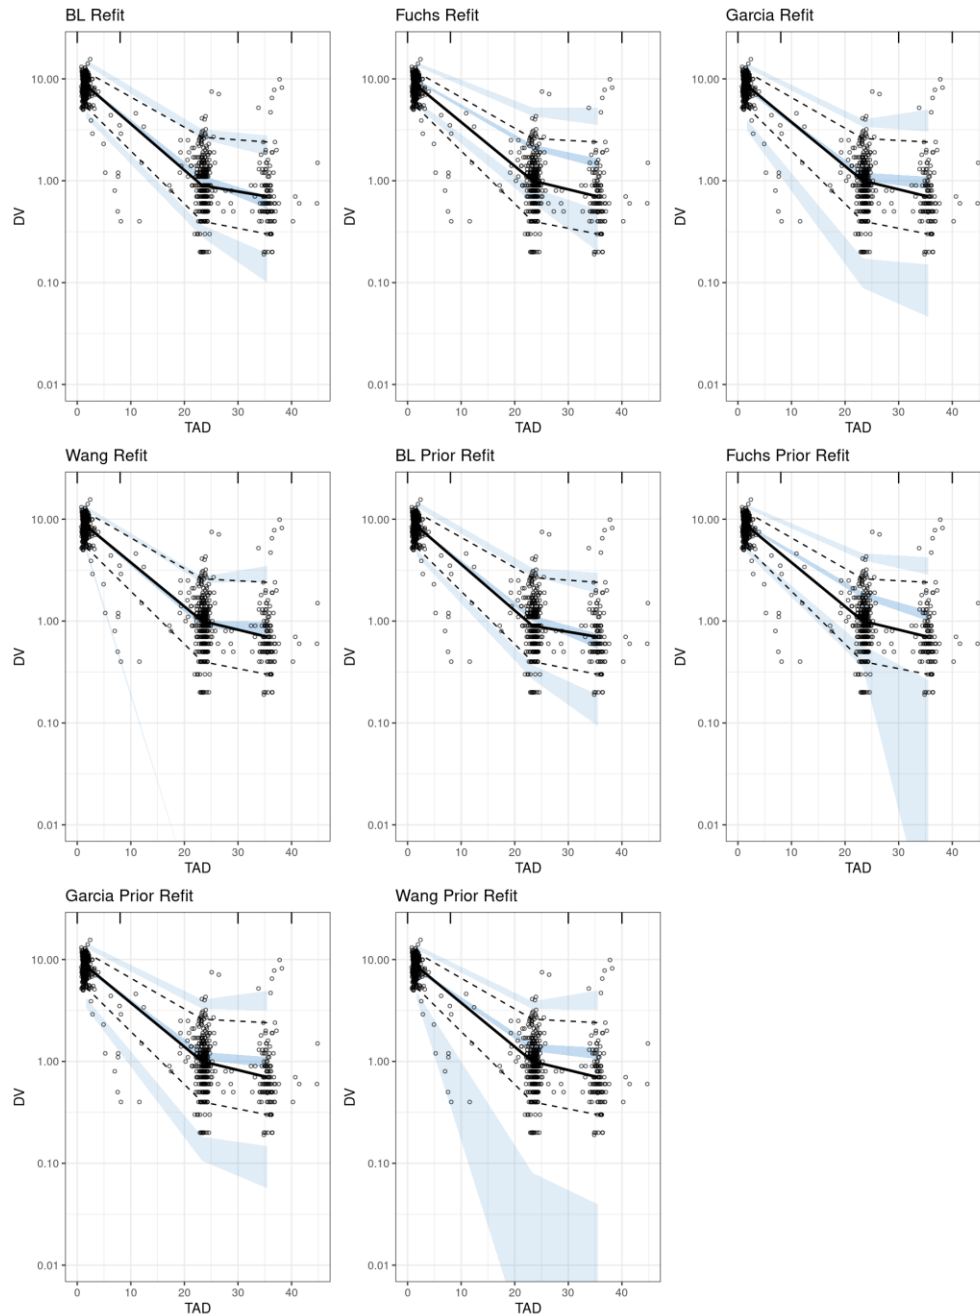

**Supplemental Figure S6.** Visual predictive checks (VPCs) of refitted models with observed gentamicin concentrations (circles) and population predictions (solid line) with corresponding 95% prediction interval (dotted lines). Semi-transparent blue fields represent model-based percentile confidence interval. BL: Bijleveld.

**Supplemental Table S1:** Model parameters from refit model with informative priors and refit model without informative priors for the Bijleveld (BL) model.

|                  | <b>BL published</b> |           | <b>BL with prior</b> |           | <b>BL without prior</b> |           |
|------------------|---------------------|-----------|----------------------|-----------|-------------------------|-----------|
| <b>Parameter</b> | <b>Estimate</b>     | <b>SE</b> | <b>Estimate</b>      | <b>SE</b> | <b>Estimate</b>         | <b>SE</b> |
| CL               | 1.00                | 0.05      | 1.19                 | 0.03      | 1.28                    | 0.04      |
| TH_PMA           | 1.89                | 0.26      | 1.94                 | 0.12      | 1.95                    | 0.15      |
| V                | 37.4                | 0.04      | 30.93                | 0.87      | 26.37                   | 1.47      |
| Q                | 0.57                | 0.67      | 0.76                 | 0.14      | 1.86                    | 0.45      |
| V2               | 17.1                | 0.49      | 13.59                | 2.05      | 21.69                   | 3.13      |
| add              | 0.18                | 0.21      | 0.06                 | 0.01      | 0.06                    | 0.01      |
| CL_IIV           | 0.11                | 0.2       | 0.08                 | 0.01      | 0.08                    | 0.01      |
| V_IIV            | 0.06                | 0.1       | 0.04                 | 0.01      | 0.06                    | 0         |

**Supplemental Table S2:** Model parameters from refit model with informative priors and refit model without informative priors for the Fuchs model.

|                  | <b>Fuchs published</b> |           | <b>Fuchs with prior</b> |           | <b>Fuchs without prior</b> |           |
|------------------|------------------------|-----------|-------------------------|-----------|----------------------------|-----------|
| <b>Parameter</b> | <b>Estimate</b>        | <b>SE</b> | <b>Estimate</b>         | <b>SE</b> | <b>Estimate</b>            | <b>SE</b> |
| CL               | 0.09                   | 0.01      | 0.09                    | 0         | 0.10                       | 0.01      |
| TH_GACL          | 1.87                   | 0.03      | 1.91                    | 0.05      | 1.83                       | 0.17      |
| TH_PNACL         | 0.05                   | 0.06      | 0.05                    | 0         | 0.03                       | 0.01      |
| V                | 0.91                   | 0.02      | 0.87                    | 0.02      | 0.92                       | 0.02      |
| TH_GAV1          | -0.92                  | 0.08      | -0.77                   | 0.05      | -0.14                      | 0.11      |
| Q                | 0.16                   | 0.07      | 0.13                    | 0.01      | 0.06                       | 0.01      |
| V2               | 0.56                   | 0.04      | 0.54                    | 0.02      | 0.48                       | 0.07      |
| prop             | 0.03                   | 0.24      | 0.03                    | 0.01      | 0.03                       | 0.01      |
| add              | 0.01                   | 0.01      | 0.08                    | 0.02      | 0.09                       | 0.03      |
| CL_IIV           | 0.08                   | 0.03      | 0.08                    | 0.01      | 0.07                       | 0.02      |
| CL_V_IIV         | 0.04                   | 0.03      | 0                       | 0         | 0                          | 0         |
| V_IIV            | 0.03                   | 0.01      | 0.03                    | 0.01      | 0.01                       | 0.01      |

**Supplemental Table S3:** Model parameters from refit model with informative priors and refit model without informative priors for the Wang model.

|           | Wang published |      | Wang with prior |      | Wang without prior |      |
|-----------|----------------|------|-----------------|------|--------------------|------|
| Parameter | Estimate       | SE   | Estimate        | SE   | Estimate           | SE   |
| CL        | 4.57           | 0.01 | 4.61            | 0.03 | 5.29               | 0.23 |
| V         | 18.1           | 0.01 | 17.8            | 0.15 | 15.35              | 0.79 |
| V2        | 17.1           | 0.01 | 17.1            | 0.10 | 17.0               | 6.73 |
| Q         | 1.07           | 0.01 | 1.07            | 0.01 | 0.90               | 0.35 |
| add       | 0.18           | 0.01 | 0.32            | 0.03 | 0.33               | 0.11 |
| CL_IIV    | 0.15           | 0    | 0.10            | 0.01 | 0.07               | 0.03 |
| CL_V_IIV  | 0.02           | 0.01 | 0.01            | 0.01 | 0.04               | 0.01 |
| V_IIV     | 0.24           | 0.01 | 0.15            | 0.01 | 0.05               | 0.01 |
| V2_IIV    | 0.45           | 0.09 | 0.49            | 0.23 | 0.57               | 0.42 |
